# Supplementary material for: Identification of two major autoantigens negatively regulating endothelial activation in Takayasu arteritis
Source: PubMed Central journal article supplement (PMC7062749; doi:10.1038/s41467-020-15088-0), 2020-03-09
Supplement: 41467_2020_15088_MOESM1_ESM.pdf [file 41467_2020_15088_MOESM1_ESM.pdf]

Supplementary Information

**Identification of two major autoantigens negatively regulating endothelial  
activation in Takayasu arteritis**

Tomoyuki Mutoh, Tsuyoshi Shirai\*, Tomonori Ishii, Yuko Shirota, Fumiyoshi Fujishima,  
Fumiaki Takahashi, Yoichi Kakuta, Yoshitake Kanazawa, Atsushi Masamune,  
Yoshikatsu Saiki, Hideo Harigae, Hiroshi Fujii

\*Correspondence: T. Shirai. Email adress: [tsuyoshirajp@med.tohoku.ac.jp](mailto:tsuyoshirajp@med.tohoku.ac.jp)

This file includes:

Supplementary Figure 1 to 17  
Supplementary Table 1 and 2  
Supplementary Method

## Supplementary Figures

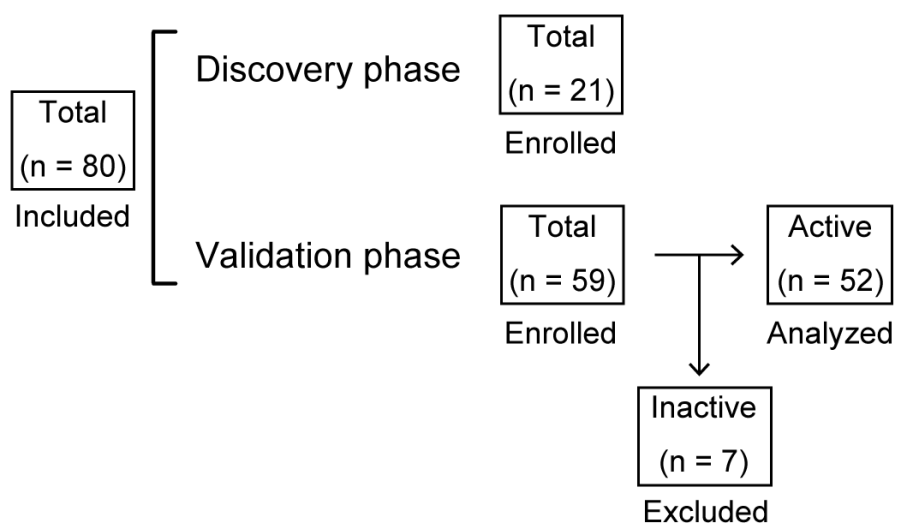

**Supplementary Fig. 1 Analysis flowchart of 80 patients with Takayasu arteritis in discovery and validation phase.**

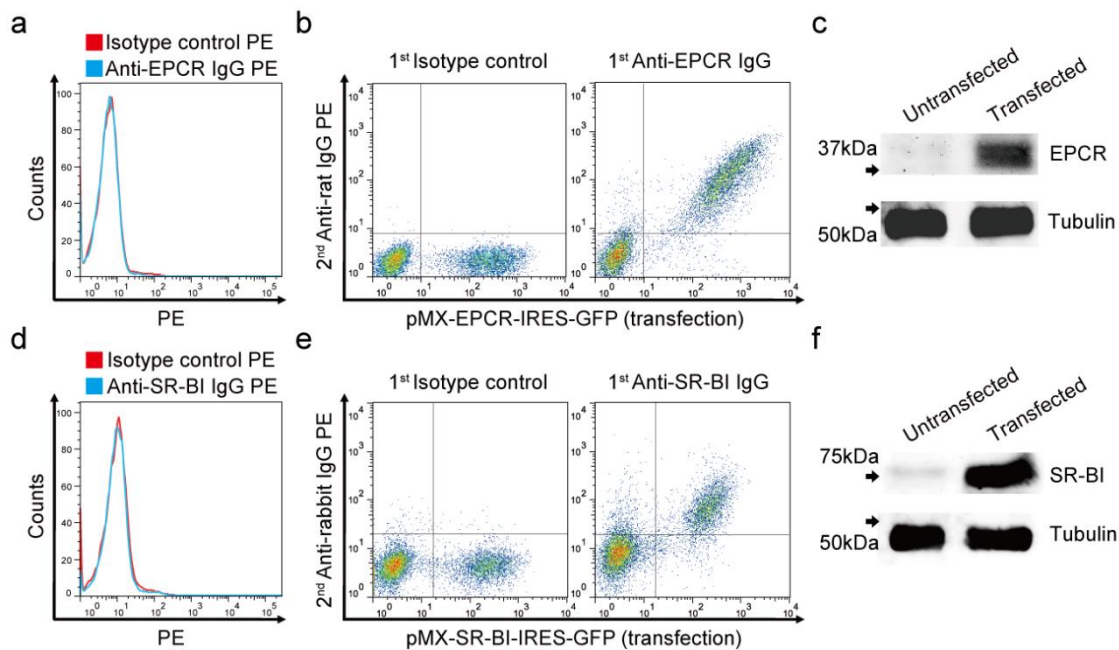

**Supplementary Fig. 2 Generation of YB2/0 cells expressing endothelial protein C receptor (EPCR) or scavenger receptor class B type 1 (SR-BI).**

**a** YB2/0 cells were stained with PE-conjugated isotype control or PE-conjugated anti-human EPCR IgG and analyzed with flow cytometry. **b** Expression vector pMX-EPCR-IRES-GFP is transfected into YB2/0 cells. The cells were stained with anti-EPCR commercial IgG or isotype control followed by PE-conjugated secondary antibody and analyzed with flow cytometry. **c** Western blotting analysis of the expression of EPCR and tubulin in untransfected or EPCR-transfected YB2/0 cells. **d** YB2/0 cells were stained with PE-conjugated isotype control or PE-conjugated anti-human SR-BI IgG and analyzed with flow cytometry. **e** Expression vector pMX-SR-BI-IRES-GFP is transfected into YB2/0 cells. The cells were stained with anti-SR-BI commercial IgG or isotype control followed by PE-conjugated secondary antibody and analyzed with flow cytometry. **f** Western blotting analysis of the expression of SR-BI and tubulin in untransfected or SR-BI-transfected YB2/0 cells.

| <b>a</b>      |          |              |            | <b>b</b>   |       |        |        |        |        |        |        |        |        |
|---------------|----------|--------------|------------|------------|-------|--------|--------|--------|--------|--------|--------|--------|--------|
| Gene          | Signal   | Basal Signal | Log2 Ratio | Activity   | U10-4 | W10-59 | X10-11 | G10-43 | Z10-39 | U10-53 | A11-08 | B11-45 | C11-12 |
| <i>PROCR</i>  | 528932.6 | 186.0        | 11.47      | Anti-EPCR  | ○     | —      | ○      | —      | ○      | —      | ○      | —      | —      |
| <i>SCARB1</i> | 61076.4  | 99.9         | 9.26       | Anti-SR-BI | —     | ○      | —      | ○      | —      | ○      | —      | ○      | —      |

**Supplementary Fig. 3 Validation of EPCR and SR-BI as novel autoantigens in Takayasu arteritis.**

**a** Microarray analysis comparing unsorted YB 2/0 cells and a mixture of cloned cells established with U10-4 IgG, W10-59 IgG, and G10-43 IgG. **b** Anti-EPCR and anti-SR-BI activities were measured among nine TAK serum samples, which were initially selected for cell sorting. Circles and lines indicate positive and negative, respectively. U10-4, W10-59, G10-43, Z10-39, U10-53, A11-08, B11-45, and C11-12 indicate the serum sample number.

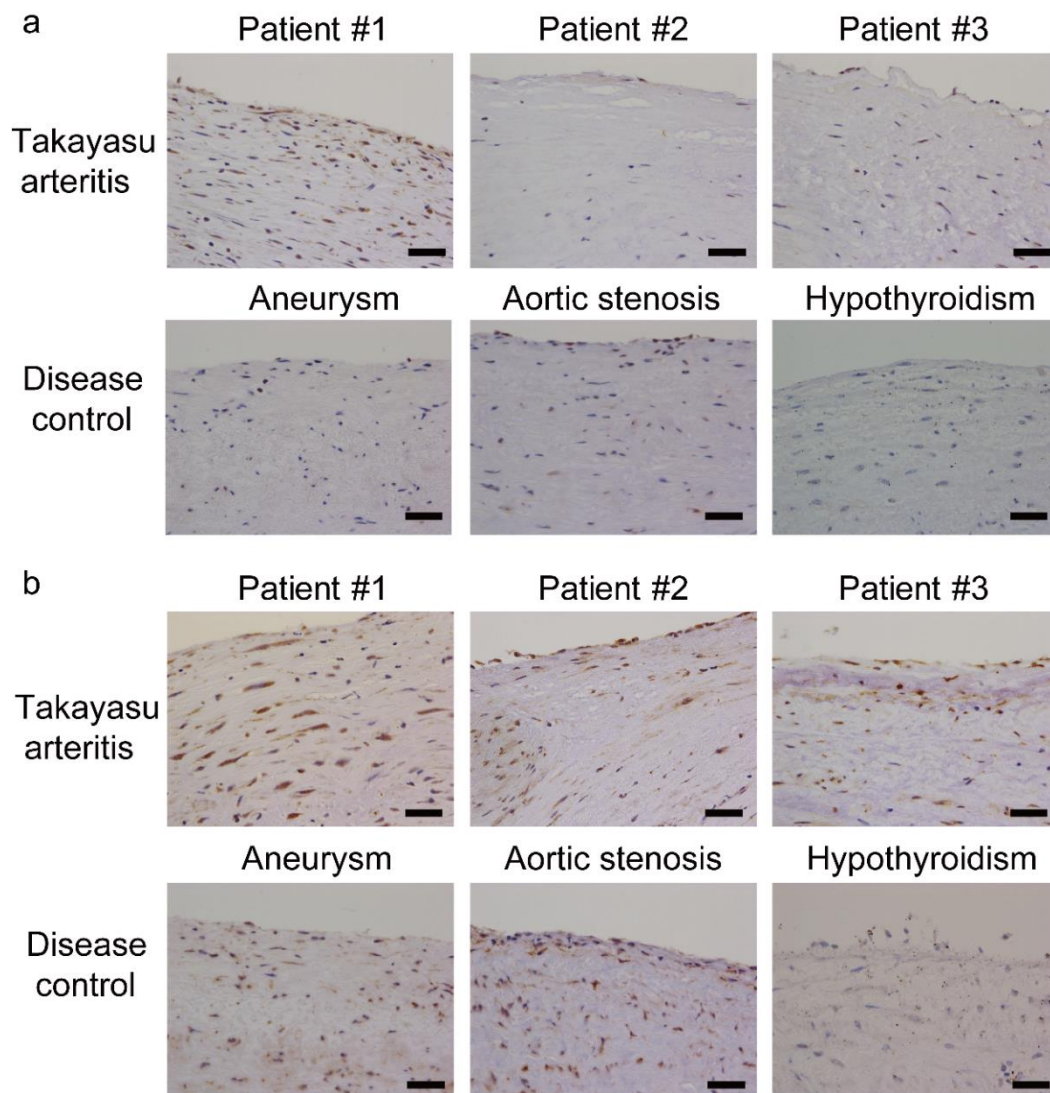

**Supplementary Fig. 4 Expressions of EPCR and SR-BI in the intima of the aorta.**

Immunohistochemical analysis was performed against EPCR (a) and SR-BI (b) in resected aortic tissue from three different patients with TAK (upper column) and non-inflammatory aortic tissue as disease controls (lower column). Disease controls included surgical specimen from patients with aortic aneurysm and aortic stenosis, and an autopsy sample from a patient with hypothyroidism. Expressions in the intima of the aorta are shown. Black bar indicates 40  $\mu$ m.

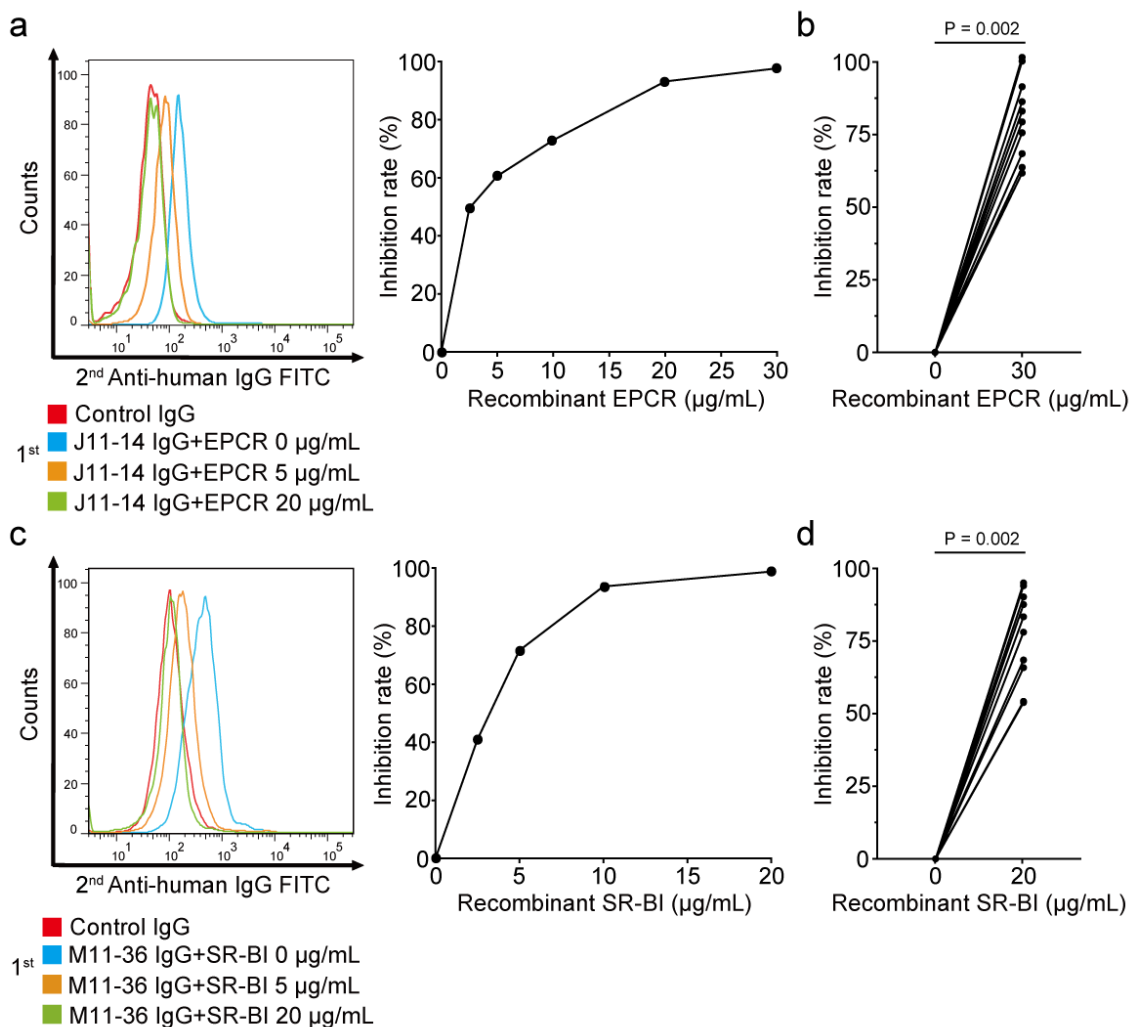

**Supplementary Fig. 5 Inhibition test of AECAs activity with recombinant protein.**

**a** Inhibition test of binding activities to human umbilical vein endothelial cells (HUVECs) was conducted using 0.5 mg/mL control IgG or IgG from anti-EPCR positive TAK AECA (J11-14) with soluble recombinant EPCR at the indicated concentrations. Representative histograms (left) and summarized graph (right) are shown. **b** Inhibition rates were measured in 10 TAK AECA with anti-EPCR activities. Statistical analysis was performed using the Wilcoxon signed-rank test. **c** Inhibition test against HUVECs was conducted using 0.5 mg/mL control IgG or IgG from anti-SR-BI positive TAK AECA (M11-36) with soluble recombinant SR-BI at the indicated concentrations. Representative histograms (left) and summarized graph (right) are shown. **d** Inhibition rates were measured in 10 TAK AECA with anti-SR-BI activities. Statistical analysis was performed using the Wilcoxon signed-rank test.

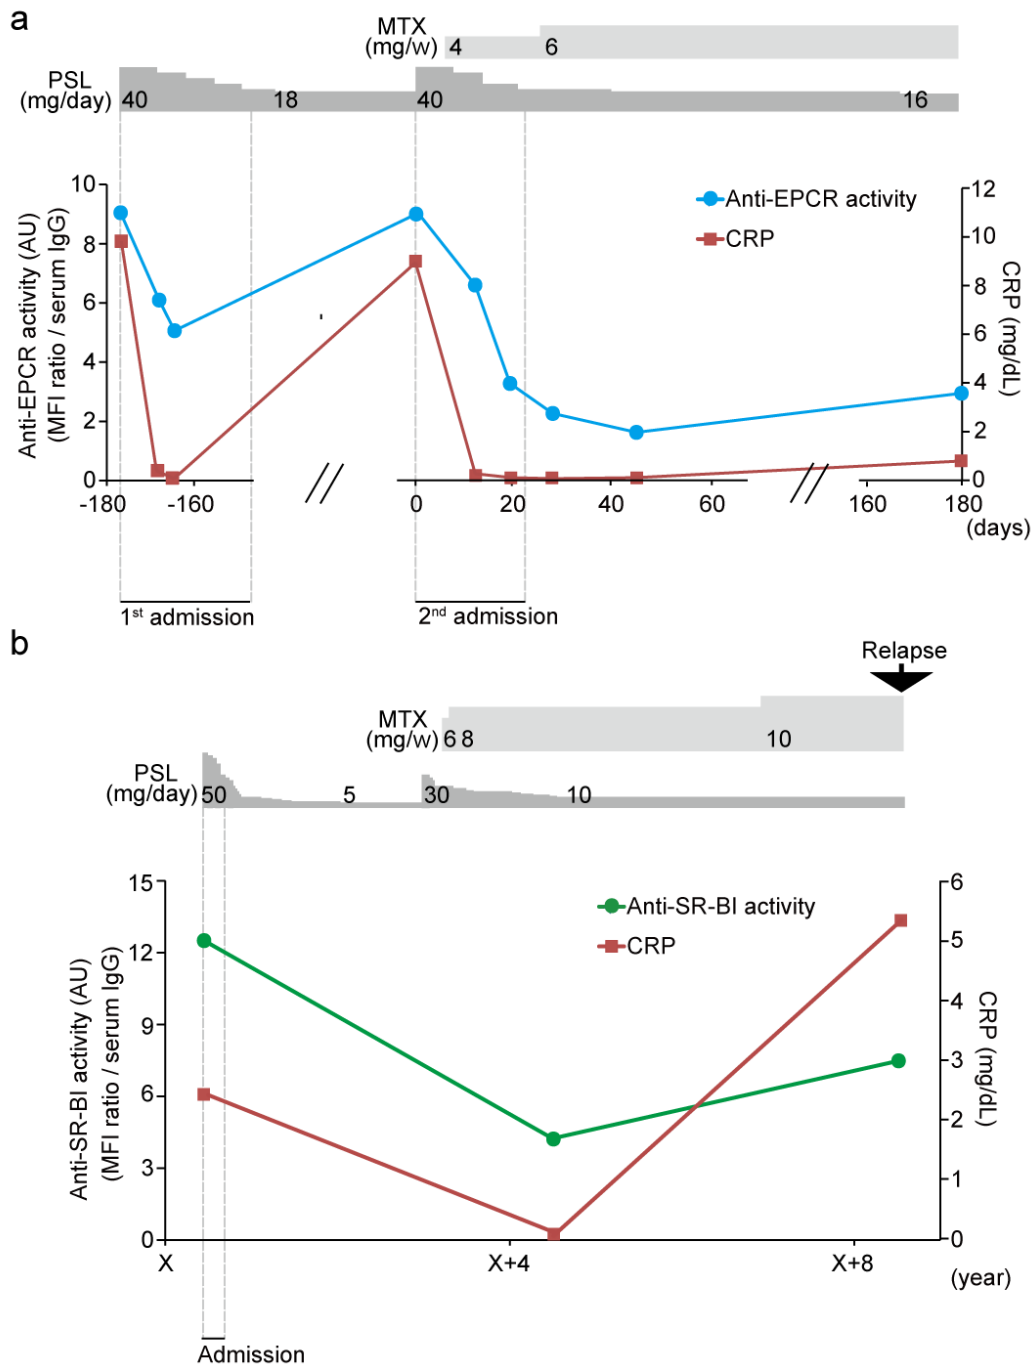

**Supplementary Fig. 6 Clinical course.**

**a, b** Clinical course of a TAK patient with anti-EPCR autoantibodies (**a**) or anti-SR-BI autoantibodies (**b**). AU, arbitrary unit; CRP, C-reactive protein; PSL, prednisolone; MFI, mean fluorescent intensity; MTX, methotrexate.

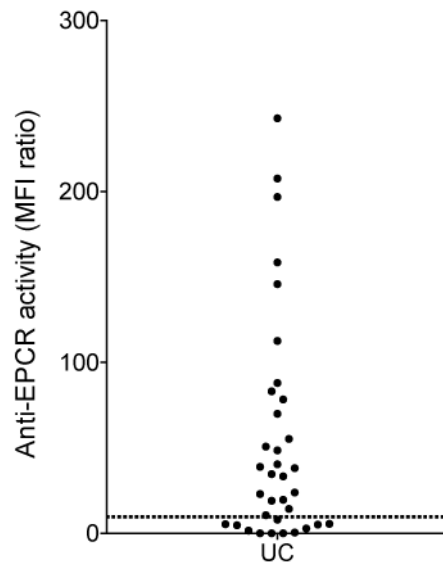

**Supplementary Fig. 7 Anti-EPCR autoantibodies in primary ulcerative colitis**

The distribution of anti-EPCR autoantibodies in patients with ulcerative colitis (UC, n=35). Dots represent the data for individual subjects. The broken horizontal line indicates the cut-off value for high activity (mean + 3SD of controls).



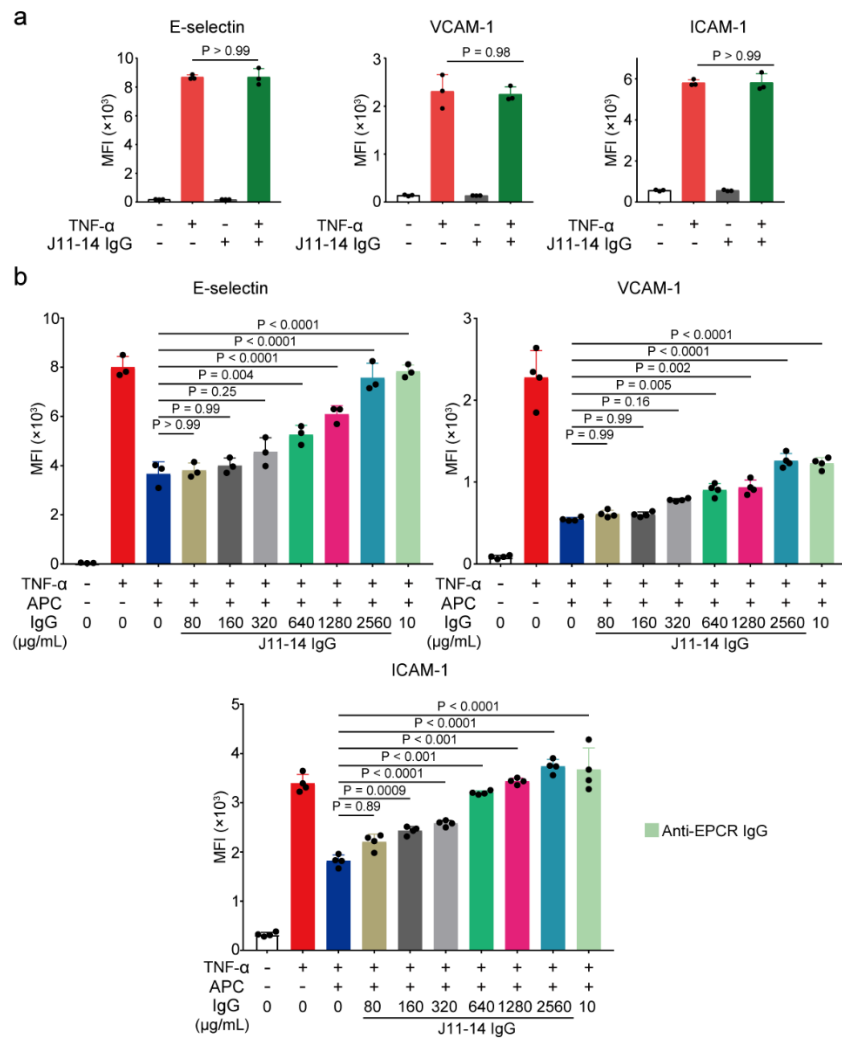

**Supplementary Fig. 8 Dose-dependent blocking effect of anti-EPCR autoantibodies in Takayasu arteritis.**

**a** HUVECs were first treated with or without 2.56 mg/mL anti-EPCR positive TAK AECA (J11-14) for 1 hour. After the removal of supernatant, cells were treated without APC for 13 hours and stimulated with or without 100 pg/mL of TNF- $\alpha$  for 5 hours. The expression of adhesion molecules was analyzed with flow cytometry (n = 3). **b** HUVECs were first treated with 10  $\mu\text{g/mL}$  anti-EPCR commercial IgG or IgG from anti-EPCR positive TAK AECA (J11-14) for 1 hour at the indicated concentrations. After the removal of supernatant, cells were treated with or without 10  $\mu\text{g/mL}$  APC for 13 hours and stimulated with 100 pg/mL of TNF- $\alpha$  for 5 hours. The expression of adhesion molecules was analyzed with flow cytometry (n = 3-4). Data are indicated as mean  $\pm$  SD. At least three independent experiments were performed. Statistical analysis was performed using one-way ANOVA test followed by Tukey's post hoc test. MFI, mean fluorescent intensity.

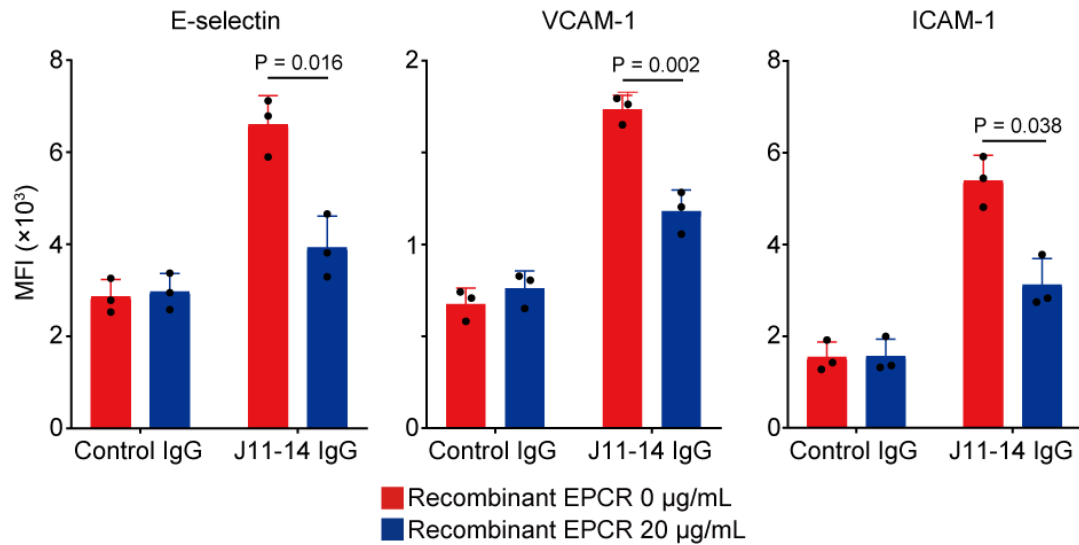

**Supplementary Fig. 9 Soluble recombinant proteins reverse blocking effect of anti-EPCR autoantibodies in Takayasu arteritis.**

HUVECs were first incubated with 2.56 mg/mL control IgG or 2.56 mg/mL IgG from anti-EPCR positive TAK AECA (J11-14) for 1 hour in the presence or absence of 20  $\mu\text{g/mL}$  soluble recombinant EPCR. After the removal of supernatant, cells were treated with 10  $\mu\text{g/mL}$  APC for 13 hours and stimulated with 100 pg/mL TNF- $\alpha$  for 5 hours. The expression of adhesion molecules was analyzed with flow cytometry (n = 3). Data are indicated as mean  $\pm$  SD. At least three independent experiments were performed. Statistical analysis was performed using the paired *t* test. MFI represents mean fluorescent intensity.

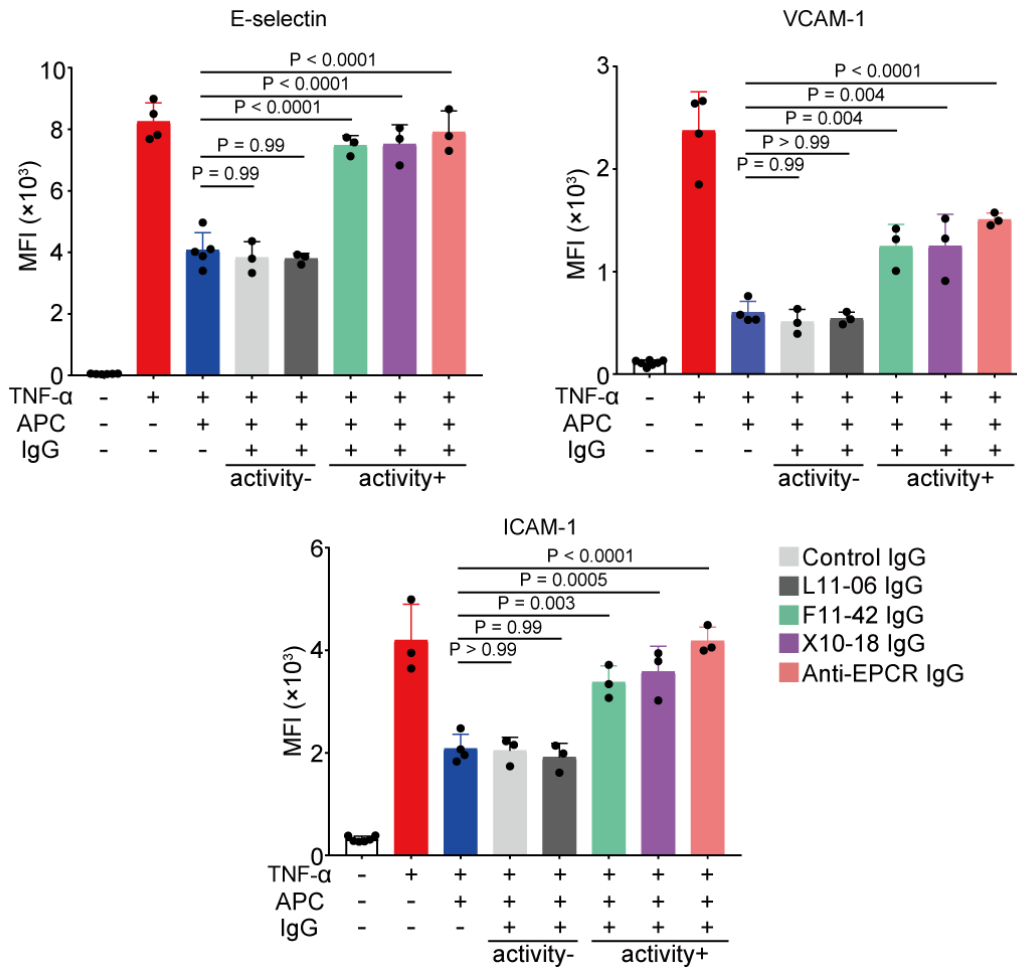

**Supplementary Fig. 10 Regulation of endothelial cell activation by anti-EPCR autoantibodies in Takayasu arteritis.**

HUVECs were first treated with 10 µg/mL anti-EPCR commercial IgG, 2.56 mg/mL IgG from anti-EPCR negative TAK AECA (L11-06) or 2.56 mg/mL IgG from anti-EPCR positive TAK AECA (F11-42, X10-18) for 1 hour. After the removal of supernatant, cells were treated with or without 10 µg/mL APC for 13 hours and then stimulated with 100 pg/mL TNF-α for 5 hours. The expression of adhesion molecules was analyzed with flow cytometry (n = 3-7). Data are indicated as mean ± SD. At least three independent experiments were performed in all cases. Statistical analysis was performed using ANOVA test followed by Tukey's post hoc test. MFI represents mean fluorescent intensity. L11-06, F11-42, and X10-18 indicate the serum sample number. Activity shows anti-EPCR activity.

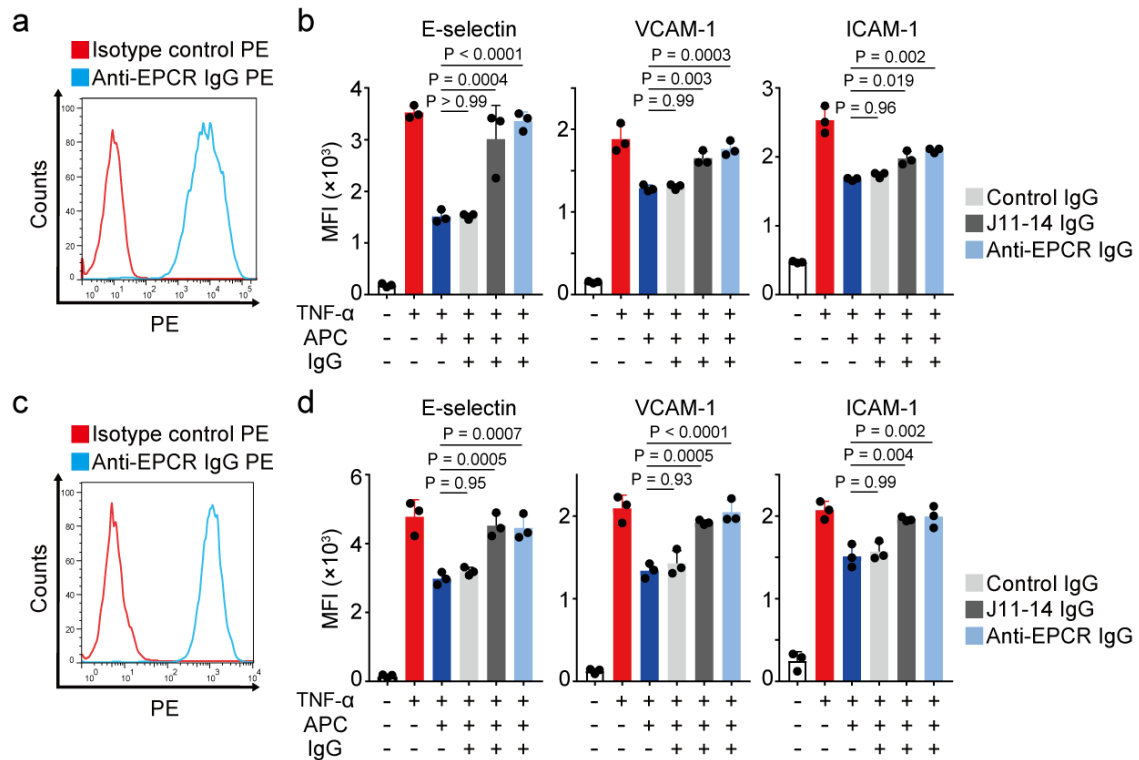

**Supplementary Fig. 11 Anti-EPCR autoantibodies block the suppressive effect of APC in HAECs and HPAECs.**

**a, c** Nonpermeabilized HAECs (**a**) or HPAECs (**c**) were stained with isotype control, or PE-conjugated anti-human EPCR IgG, and analyzed with flow cytometry. **b, d** HAECs (**b**) and HPAECs (**d**) were first treated with 10  $\mu\text{g}/\text{mL}$  anti-EPCR commercial IgG or 2.56 mg/mL IgG from anti-EPCR positive TAK AECA (J11-14) for 1 hour. After the removal of supernatant, cells were treated with or without 10  $\mu\text{g}/\text{mL}$  APC for 13 hours and then stimulated with 100  $\text{pg}/\text{mL}$  TNF- $\alpha$  for 5 hours. The expression of adhesion molecules was analyzed with flow cytometry ( $n = 3$ ). Data are indicated as mean  $\pm$  SD. At least three independent experiments were performed in all cases. Statistical analysis was performed using ANOVA test followed by Tukey's post hoc test. MFI represents mean fluorescent intensity. J11-14 indicates the serum sample number.

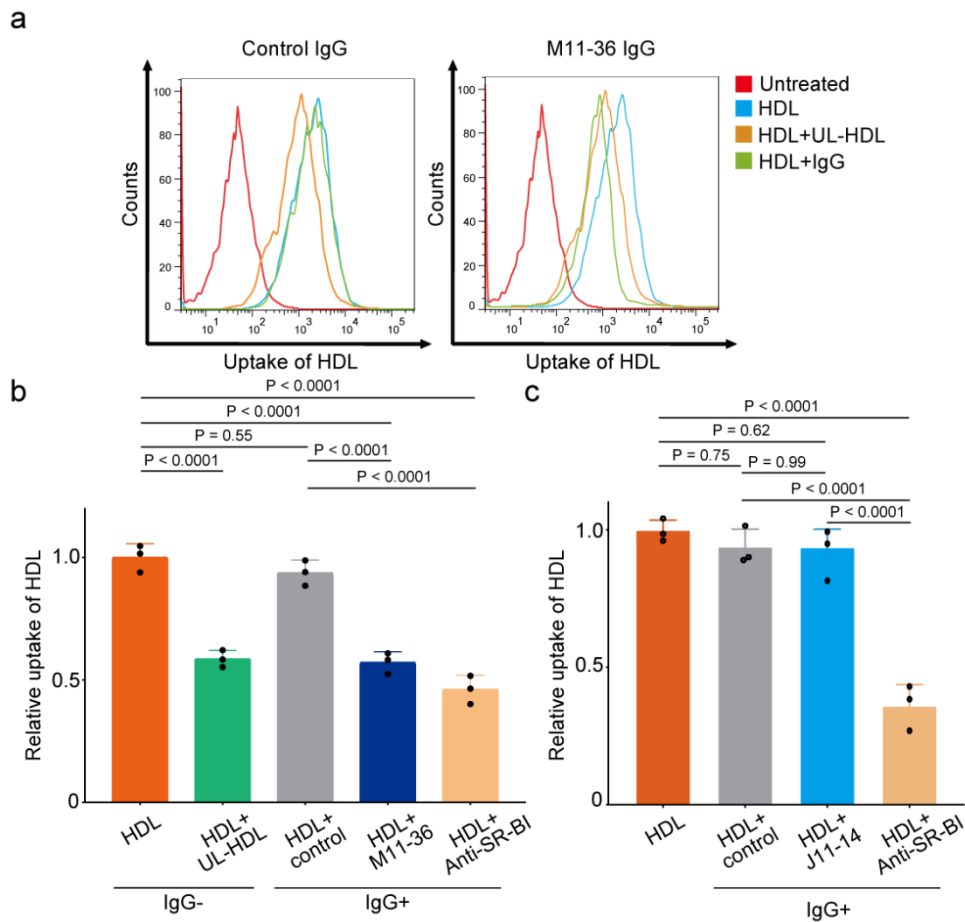

**Supplementary Fig. 12 Anti-SR-BI autoantibodies in Takayasu arteritis inhibit uptake of HDL.**

**a, b, c** HUVECs were starved for 4 hours followed by treatment with or without 20  $\mu$ g unlabeled-HDL (UL-HDL), 2.56 mg/mL control IgG, 2.56 mg/mL IgG from anti-SR-BI positive TAK AECA (M11-36), or anti-EPCR positive TAK AECA (J11-14), or 10  $\mu$ g/mL anti-SR-BI commercial IgG for 1 hour. After the removal of supernatant, cells were incubated with fluorescent HDL (10  $\mu$ g) for additional 4 hours. Uptake of HDL was analyzed with flow cytometry (n = 3). Representative histograms (**a**) and summarized graph (n = 3) (**b, c**) are shown. Data are indicated as mean  $\pm$  SD. At least three independent experiments were performed in all cases. Statistical analysis was performed using one-way ANOVA test followed by Tukey's post hoc test. M11-36 indicates the serum sample number.

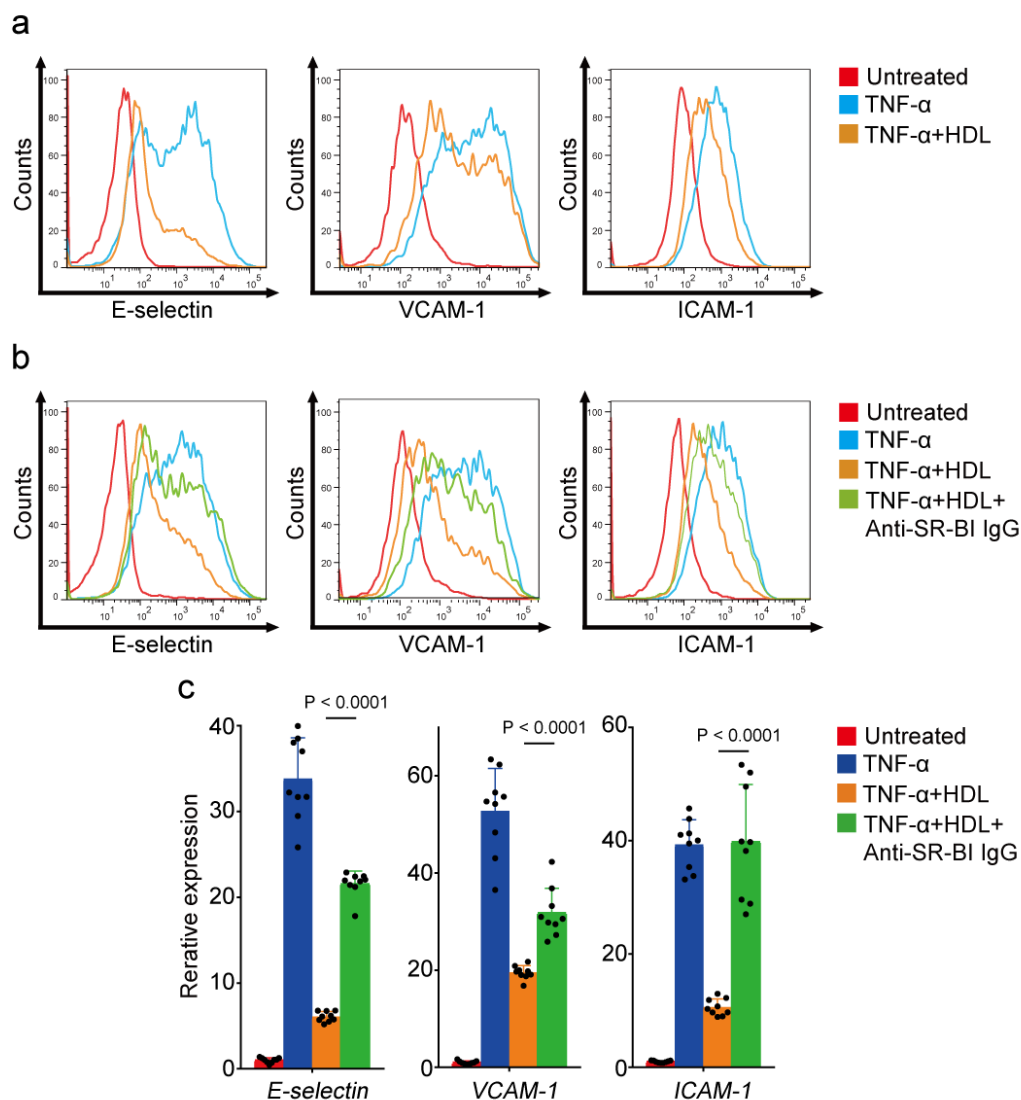

**Supplementary Fig. 13 Anti-SR-BI commercial IgG blocks the suppressive effect of HDL upon upregulation of adhesion molecules.**

**a** HUVECs were treated with or without 1 mg/mL HDL for 16 hours and then stimulated with 100 pg/mL TNF- $\alpha$  for 5 hours. The expression of adhesion molecules was analyzed with flow cytometry. **b, c** HUVECs were first treated with or without 10  $\mu$ g/mL anti-SR-BI commercial IgG for 1 hour. After the removal of supernatant, cells were treated with or without HDL and stimulated with TNF- $\alpha$  as described. The expression of protein and mRNA of adhesion molecules was analyzed with flow cytometry (**b**) and quantitative PCR ( $n = 9$ ) (**c**), respectively. Data are indicated as mean  $\pm$  SD. At least three independent experiments were performed in all cases. Statistical analysis was performed using one-way ANOVA test followed by Tukey's post hoc test.

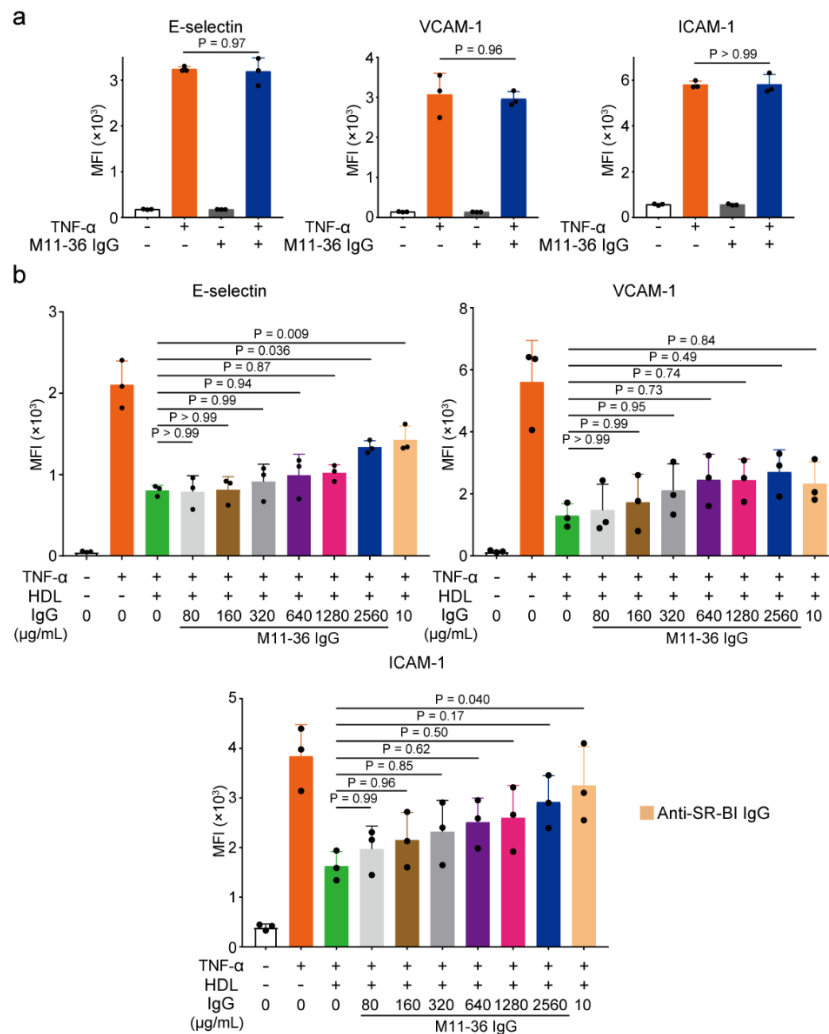

**Supplementary Fig. 14 Dose-dependent blocking effect of anti-SR-BI autoantibodies in Takayasu arteritis.**

**a** HUVECs were first treated with or without 2.56 mg/mL anti-SR-BI positive TAK AECA (M11-36) for 1 hour. After the removal of supernatant, cells were treated without HDL for 16 hours and stimulated with or without 100 pg/mL of TNF- $\alpha$  for 5 hours. The expression of adhesion molecules was analyzed with flow cytometry (n = 3). **b** HUVECs were first treated with 10  $\mu\text{g/mL}$  anti-SR-BI commercial IgG or IgG from anti-SR-BI positive TAK AECA (M11-36) for 1 hour at the indicated concentrations. After the removal of supernatant, cells were treated with or without 1 mg/mL HDL for 16 hours and then stimulated with 100 pg/mL of TNF- $\alpha$  for 5 hours. The expression of adhesion molecules was analyzed with flow cytometry (n = 3). Data are indicated as mean  $\pm$  SD. At least three independent experiments were performed in all cases. Statistical analysis was performed using one-way ANOVA test followed by Tukey's post hoc test. MFI represents mean fluorescent intensity. M11-36 indicates the serum sample number.

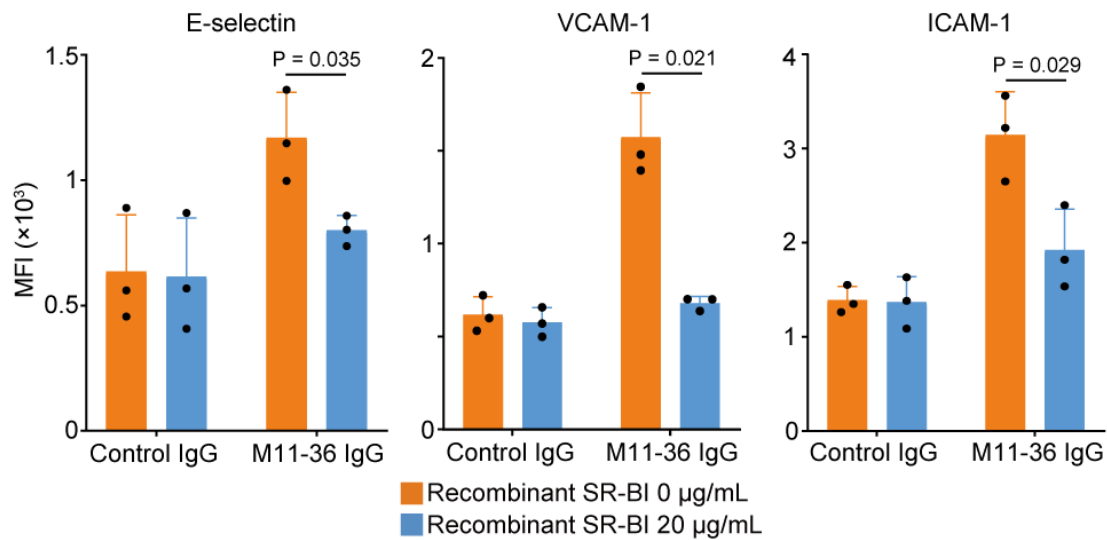

**Supplementary Fig. 15 Soluble recombinant proteins reverse blocking effect of anti-SR-BI autoantibodies in Takayasu arteritis.**

HUVECs were first incubated with 2.56 mg/mL control IgG or 2.56 mg/mL IgG from anti-SR-BI positive TAK AECA (M11-36) for 1 hour in the presence or absence of 20 µg/mL soluble recombinant SR-BI. After the removal of supernatant, cells were treated with or without 1 mg/mL HDL for 16 hours and stimulated with 100 pg/mL TNF-α for 5 hours. The expression of adhesion molecules was analyzed with flow cytometry (n = 3). Data are indicated as mean ± SD. At least three independent experiments were performed in all cases. Statistical analysis was performed using the paired *t* test. MFI represents mean fluorescent intensity. M11-36 indicates the serum sample number.



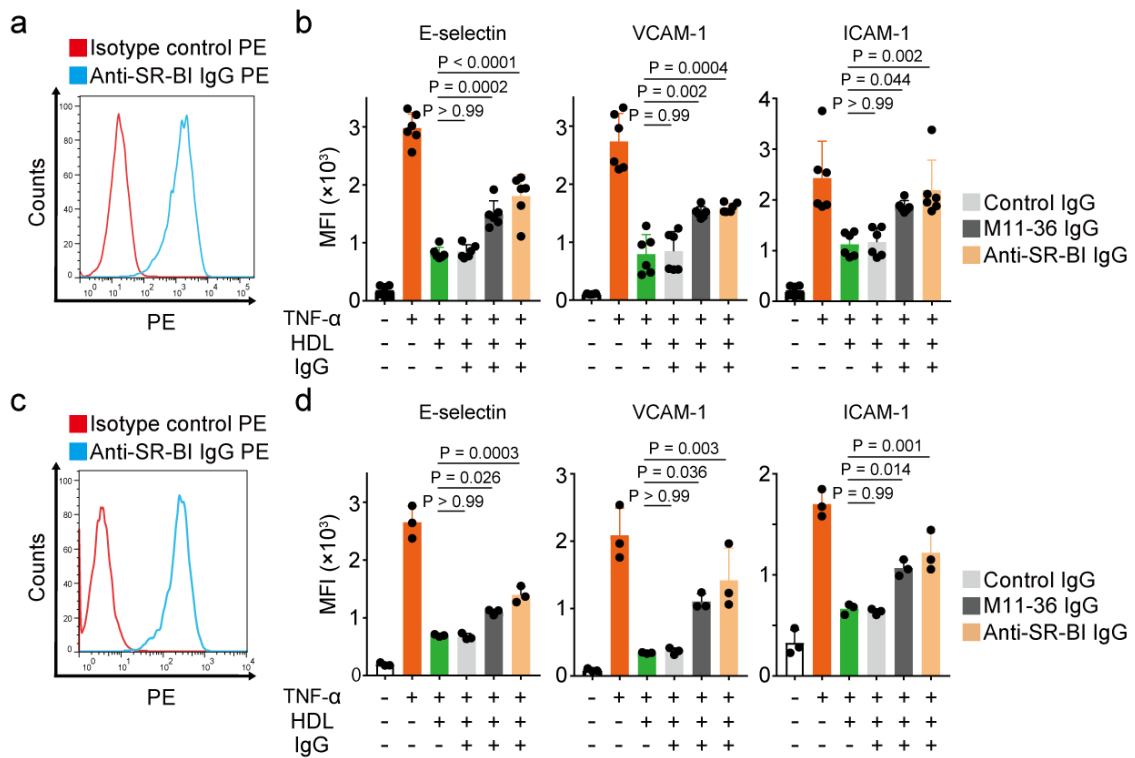

**Supplementary Fig. 16 Anti-SR-BI autoantibodies block the suppressive effect of HDL in HAECs and HPAECs.**

**a, c** Nonpermeabilized HAECs (**a**) or HPAECs (**c**) were stained with isotype control, or PE-conjugated anti-human SR-BI IgG, and analyzed with flow cytometry. **b, d** HAECs (**b**,  $n = 6$ ) and HPAECs (**d**,  $n = 3$ ) were first treated with 10  $\mu\text{g}/\text{mL}$  anti-SR-BI commercial IgG or 2.56  $\text{mg}/\text{mL}$  IgG from anti-SR-BI positive TAK AECA (M11-36) for 1 hour at the indicated concentrations. After the removal of supernatant, cells were treated with or without 1  $\text{mg}/\text{mL}$  HDL for 16 hours and then stimulated with 100  $\text{pg}/\text{mL}$  of TNF- $\alpha$  for 5 hours. The expression of adhesion molecules was analyzed with flow cytometry. Data are indicated as mean  $\pm$  SD. At least three independent experiments were performed in all cases. Statistical analysis was performed using one-way ANOVA test followed by Tukey's post hoc test. MFI represents mean fluorescent intensity. M11-36 indicates the serum sample number.

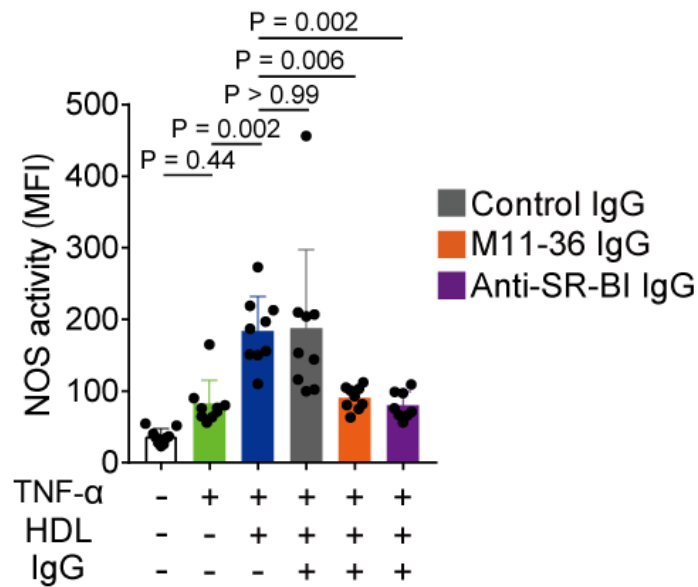

**Supplementary Fig. 17 Anti-SR-BI autoantibodies block HDL induced NOS activity in HUVECs.**

HUVECs were first treated with 10 µg/mL anti-SR-BI commercial IgG or 2.56 mg/mL IgG from anti-SR-BI positive TAK AECA (M11-36) for 1 hour. After the removal of supernatant, cells were treated with or without 1 mg/mL HDL for 16 hours and then stimulated with 100 pg/mL of TNF-α for 5 hours. After the removal of supernatant, cells were incubated with 1X Nitric Oxide Fluorometric Probe for 1 hour. The activity of NOS was analyzed with flow cytometry (n = 8-9). Data are indicated as mean ± SD. At least three independent experiments were performed in all cases. Statistical analysis was performed using one-way ANOVA test followed by Tukey's post hoc test. MFI represents mean fluorescent intensity. M11-36 indicates the serum sample number.

**Supplementary Table 1. Baseline characteristics of 50 Takayasu arteritis patients with or without anti-EPCR or anti-SR-BI autoantibodies**

|                                      | SR-BI+<br>EPCR-<br>n = 17 | SR-BI-<br>EPCR+<br>n = 16 | SR-BI-<br>EPCR-<br>n = 17 |
|--------------------------------------|---------------------------|---------------------------|---------------------------|
| Age at onset (year)                  | 41.2 ± 20.2               | 34.3 ± 14.1               | 35.5 ± 15.4               |
| Sex (female)                         | 15 (88.2%)                | 15 (93.8%)                | 16 (94.1%)                |
| Duration until diagnosis<br>(months) | 6.0<br>(1–36)             | 3.5<br>(1–96)             | 4.0<br>(1–120)            |
| Dissection                           | 2 (11.8%)                 | 0 (0%)                    | 2 (11.8%)                 |
| Aneurysm                             | 5 (29.4%)                 | 4 (25.0%)                 | 1 (5.9%)                  |
| Hypertension                         | 9 (52.9%)                 | 6 (37.5%)                 | 9 (52.9%)                 |
| Relapse                              | 8 (47.1%)                 | 5 (31.3%)                 | 9 (52.9%)                 |
| T-Chol (mg/dL)                       | 178.1 ± 51.1              | 182.7 ± 46.4              | 196.4 ± 42.5              |
| LDL (mg/dL)                          | 99.7 ± 28.0               | 107.4 ± 36.1              | 109.7 ± 22.3              |
| HDL (mg/dL)                          | 58.1 ± 26.0               | 56.0 ± 19.2               | 61.8 ± 22.8               |
| TG (mg/dL)                           | 84.9 ± 38.3               | 96.4 ± 38.5               | 95.1 ± 79.6               |
| Classification of affected<br>vessel |                           |                           |                           |
| IIa                                  | 2 (11.8%)                 | 5 (31.3%)                 | 2 (11.8%)                 |
| IIb                                  | 2 (11.8%)                 | 5 (31.3%)                 | 6 (35.3%)                 |
| III                                  | 1 (5.9%)                  | 0 (0%)                    | 3 (17.7%)                 |
| IV                                   | 0 (0%)                    | 0 (0%)                    | 0 (0%)                    |
| Pulmonary artery                     | 2 (11.8%)                 | 2 (12.5%)                 | 1 (5.9%)                  |
| Coronary artery                      | 2 (11.8%)                 | 2 (12.5%)                 | 1 (5.9%)                  |
| Renal artery                         | 6 (35.3%)                 | 1 (6.3%)                  | 5 (29.4%)                 |
| Ascending aorta                      | 15 (88.2%)                | 14 (87.5%)                | 12 (70.6%)                |
| Descending aorta                     | 14 (82.4%)                | 9 (56.3%)                 | 13 (76.5%)                |
| Abdominal aorta                      | 12 (70.6%)                | 4 (25.0%)                 | 7 (41.2%)                 |
| CCA                                  | 14 (82.4%)                | 13 (81.3%)                | 12 (70.6%)                |
| SCA                                  | 15 (88.2%)                | 13 (81.3%)                | 13 (76.5%)                |
| BCA                                  | 8 (47.1%)                 | 9 (56.3%)                 | 7 (41.2%)                 |

Values represent mean ± SD, median (minimum to maximum), or number (%). BCA, brachiocephalic artery; CCA, common carotid artery; HDL, high density lipoprotein; LDL, low density lipoprotein; SCA, subclavian artery; T-Chol, total cholesterol; TG, triglycerides.

**Supplementary Table 2. Baseline characteristics of two Takayasu arteritis patients with anti-EPCR and anti-SR-BI autoantibody**

|                                   | SR-BI+ EPCR+<br>n = 2 |
|-----------------------------------|-----------------------|
| Age at onset (year)               | 37.5 ± 0.5            |
| Sex (female)                      | 2 (100%)              |
| Duration until diagnosis (month)  | 28.5<br>(9-48)        |
| Stroke                            | 0 (0%)                |
| Cardiovascular diseases           | 0 (0%)                |
| Aortic regurgitation              | 0 (0%)                |
| Dissection                        | 0 (0%)                |
| Aneurysm                          | 0 (0%)                |
| Hypertension                      | 1 (50.0%)             |
| Ulcerative colitis                | 1 (50.0%)             |
| Surgical history                  | 0 (0%)                |
| Relapse                           | 1 (50.0%)             |
| CRP (mg/dL)                       | 2.1 ± 1.5             |
| ESR (mm/hour)                     | 76.0 ± 49.7           |
| T-Chol (mg/dL)                    | 173.0 ± 43.8          |
| LDL (mg/dL)                       | 90.5 ± 36.1           |
| HDL (mg/dL)                       | 64.5 ± 12.0           |
| TG (mg/dL)                        | 101.5 ± 12.0          |
| Classification of affected vessel |                       |
| I                                 | 0 (0%)                |
| II                                | 2 (100%)              |
| IIa                               | 1 (50%)               |
| IIb                               | 1 (50%)               |
| III                               | 0 (0%)                |
| IV                                | 0 (0%)                |
| V                                 | 0 (0%)                |
| Pulmonary artery                  | 1 (50%)               |
| Coronary artery                   | 0 (0%)                |
| Renal artery                      | 0 (0%)                |
| Ascending aorta                   | 2 (100%)              |

|                  |          |
|------------------|----------|
| Descending aorta | 1 (50%)  |
| Abdominal aorta  | 0 (0%)   |
| CCA              | 2 (100%) |
| SCA              | 2 (100%) |
| BCA              | 2 (100%) |

---

Values represent mean  $\pm$  SD, median (minimum to maximum), or number (%). BCA, brachiocephalic artery; CCA, common carotid artery; CRP, C-reactive protein; ESR, erythrocyte sedimentation rate; HDL, high density lipoprotein; LDL, low density lipoprotein; SCA, subclavian artery; T-Chol, total cholesterol; TG, triglycerides.

## **Supplementary Method**

### **Microarray analysis**

Total RNA from cloned cells and unsorted cells was isolated and cDNA was generated, which was subjected to microarray analysis (GeneChip Human Genome U133 Plus 2.0 Array; Affymetrix, Santa Clara, CA, USA).

### **HDL uptake assay**

HUVECs were starved for 4 hours followed by incubation with 10 µg fluorescently labeled HDL (BioVision, Milpitas, CA, USA) for 4 hours according to the manufacturer's instructions. The uptake of fluorescently labeled HDL was measured with flow cytometry. The effect of 2.56 mg/mL purified IgG, 10 µg/mL rabbit anti-human SR-BI antibody (PA5-29789, Abcam, 1:100, or NB400-113, Novus Biologicals, 1:100), or rat anti-human EPCR antibody [RCR-252] (ab81712, Abcam, 1:10) was examined, and further competed with 20 µg unlabeled-HDL (BioVision).

### **Detection of NOS activity**

The OxiSelect™ intracellular Nitric Oxide (NO) assay kit (Fluorometric) was purchased from Cell Biolabs. HUVECs were first incubated in 12-well culture plates (BD Biosciences) with or without IgG for 1 hour, followed by the addition of 1 mg/mL human HDL (Prospec Protein Specialist). Subsequently, HUVECs were stimulated by 100 pg/mL TNF-α (R&D Systems) for 5 hours. After removing medium from the wells, cells were washed 2 times with PBS, and incubated with serum free medium including 1X Nitric Oxide Fluorometric Probe (Cell Biolabs) in dark at 37°C for 1 hour. Then, fluorescence levels were measured with flow cytometry.
